# Supplementary material for: Unraveling High‐Yield Phase‐Transition Dynamics in Transition Metal Dichalcogenides on Metallic Substrates
Source: PubMed Central journal article supplement (PMC6446595; doi:10.1002/advs.201802093), 2019-01-25
Supplement: ADVS-6-1802093-s001.pdf [file ADVS-6-1802093-s001.pdf]

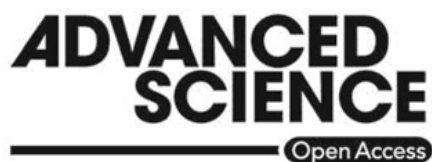

## Supporting Information

for *Adv. Sci.*, DOI: 10.1002/adv.201802093

### Unraveling High-Yield Phase-Transition Dynamics in Transition Metal Dichalcogenides on Metallic Substrates

*Xinmao Yin, Chi Sin Tang, Di Wu, Weilong Kong, Changjian Li, Qixing Wang, Liang Cao, Ming Yang, Yung-Huang Chang, Dianyuan Qi, Fangping Ouyang, Stephen J. Pennycook, Yuan Ping Feng, Mark B. H. Breese, Shi Jie Wang, Wenjing Zhang,\* Andriwo Rusydi,\* and Andrew T. S. Wee\**

## Supporting Information

# Unravelling high-yield phase-transition dynamics in transition metal dichalcogenides on metallic substrates

Xinmao Yin, Chi Sin Tang, Di Wu, Weilong Kong, Changjian Li, Qixing Wang, Liang Cao, Ming Yang, Di Wu, Yung-Huang Chang, Dianyu Qi, Stephen John Pennycook, Yuan Ping Feng, Mark B. H. Breese, Shi Jie Wang, Wenjing Zhang\*, Andriwo Rusydi\*, Andrew T. S. Wee\*

### Supporting Figures

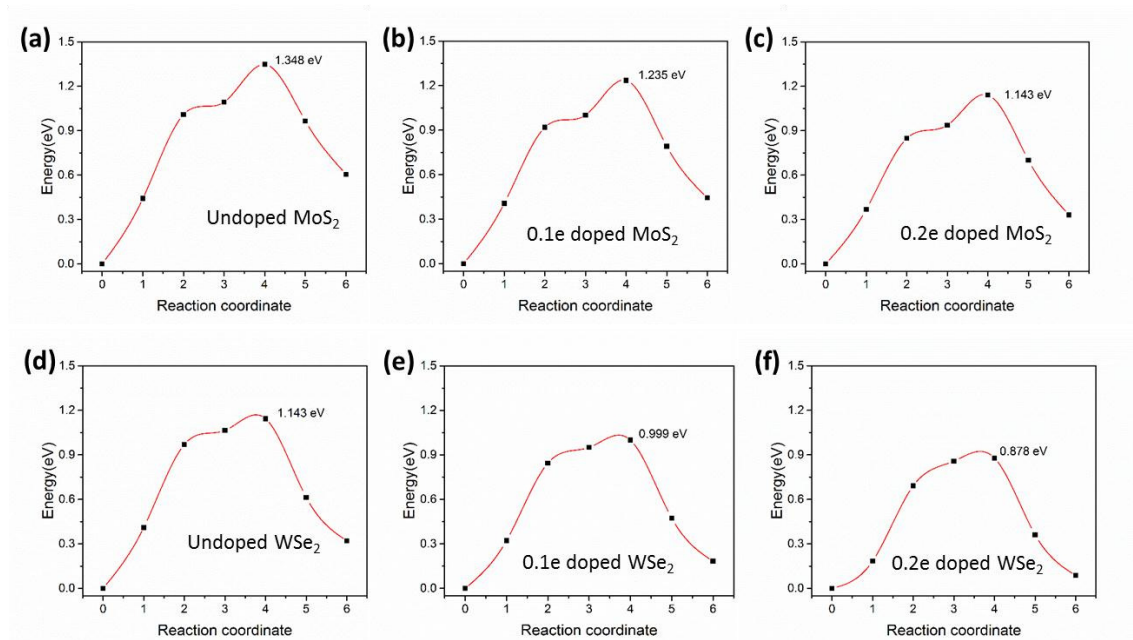

**Figure S1.** Energy curve for 7 steps of the process of phase transition in 2D-TMDs. The energy curve along the structure transition path from monolayer a-c) 1H-MoS<sub>2</sub> to 1T'-

MoS<sub>2</sub>, and from monolayer d-f) 1H-WSe<sub>2</sub> to 1T'-WSe<sub>2</sub>, calculated by c-Nudged Elastic Band method, where different images are noted by the reaction coordinate.

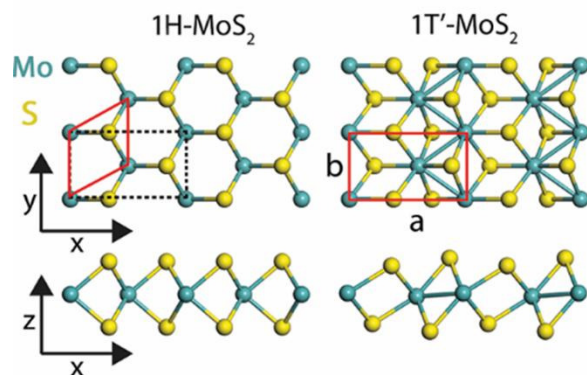

**Figure S2.** Atomistic structures of different phases of MoS<sub>2</sub>. Atomistic structures of 1H and 1T'-phase MoS<sub>2</sub>, in which the primitive cells are denoted as red solid lines, respectively.

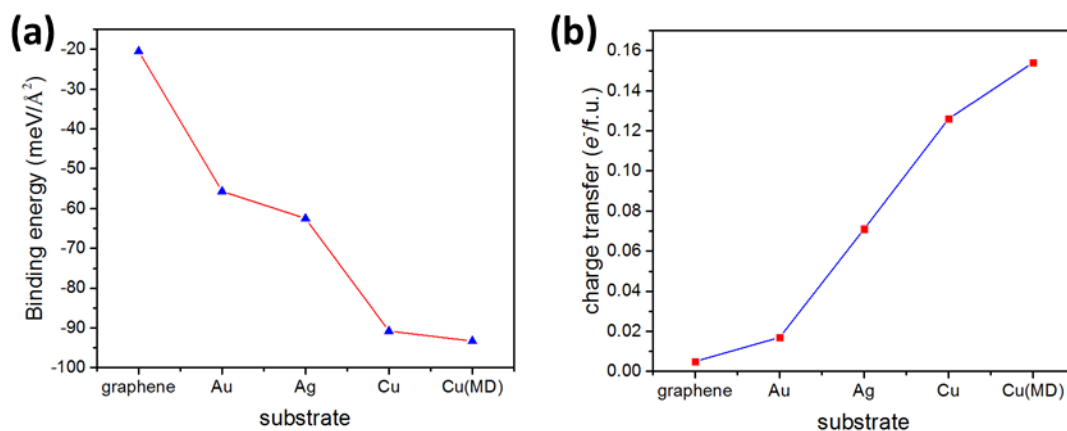

**Figure S3.** Calculated interfacial hybridizations between MoS<sub>2</sub> and metallic substrates. a) Binding energy of 1H-MoS<sub>2</sub> with graphene, Au, Ag, and Cu. b) Charge transfer from different substrates to 1H-MoS<sub>2</sub>. Cu(MD) denotes the MoS<sub>2</sub>/Cu after molecular dynamics simulations.

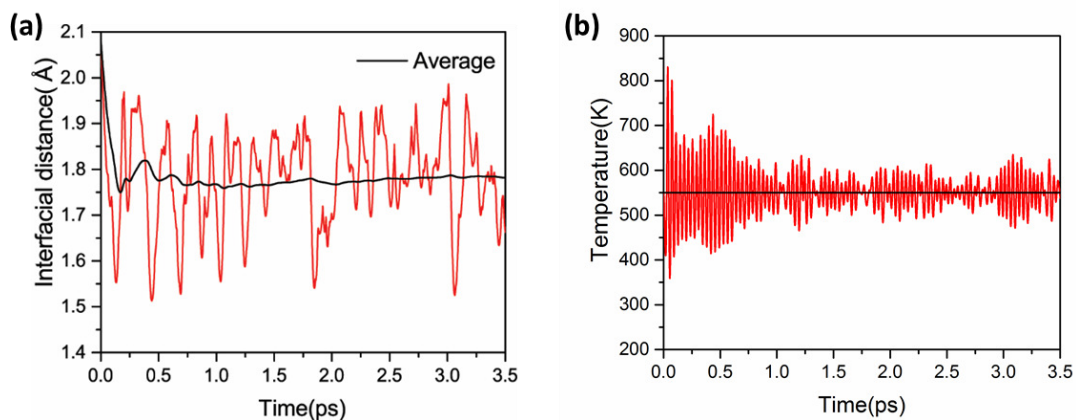

**Figure S4.** Molecular dynamics simulations after annealing of MoS<sub>2</sub> on Cu. a,b) The interfacial distance variations versus the time and the temperature evolution of the 1H-MoS<sub>2</sub>/Cu during molecular dynamics simulations after annealing at 550K. The red line in (a) is the variation of the interfacial distance between monolayer 1H-MoS<sub>2</sub> and Cu substrate, the black line in (a) is the averaged interfacial distance which averages all the distances gained in previous time.

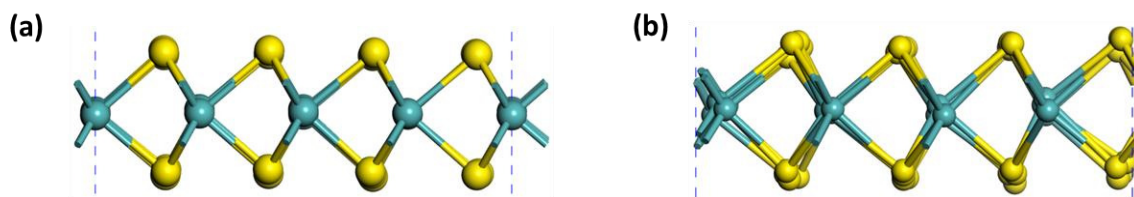

**Figure S5.** The structure change of MoS<sub>2</sub> induced by the thermal effect in molecular dynamic simulations. a,b) The distortion of the bonds (a) at ground state, and (b) after molecular dynamics simulations with annealing temperature of 550K in monolayer-MoS<sub>2</sub>. Details in Experimental Section.

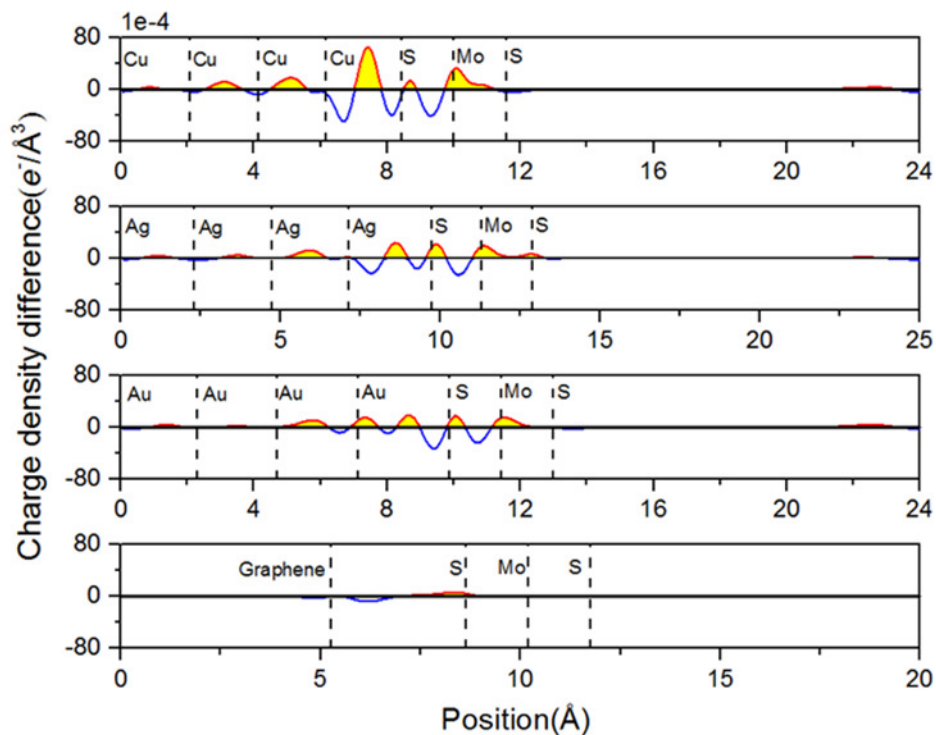

**Figure S6.** Calculated charge density difference of MoS<sub>2</sub> on metallic substrates.

Averaged charge density difference along the Z direction of 1H-MoS<sub>2</sub> on graphene, Au, Ag, Cu. The charge accumulation between bottom S atomic layers and the top substrate layers indicates the hybridization of MoS<sub>2</sub> with the substrate. The charge accumulation on Mo atomic layers and charge depletion between Mo atomic layer and interfacial S atomic layer indicate the hybridization between Mo and S atomic layers would be weakened thus decreased the Mo-S bond strength.

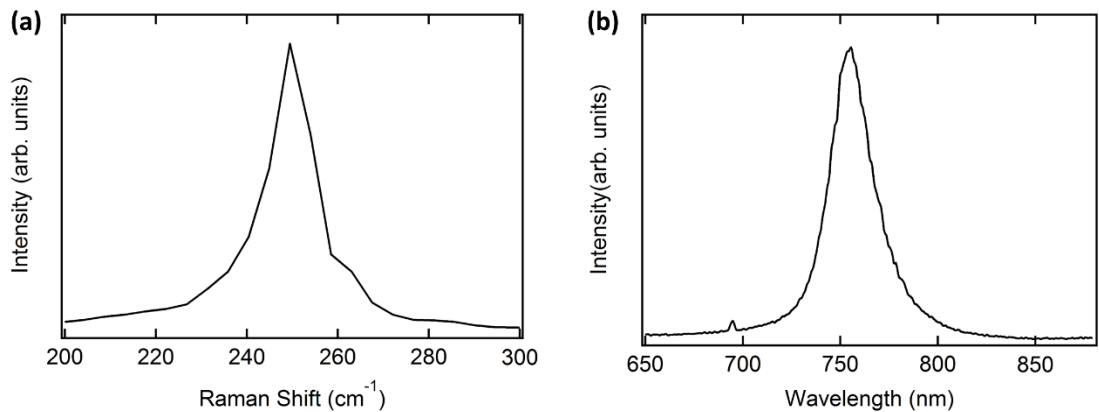

**Figure S7.** Raman and Photoluminescence spectra for the CVD monolayer-WSe<sub>2</sub> on sapphire. a) Raman spectra, where the two characteristic peaks for monolayer-WSe<sub>2</sub> at ~250 cm<sup>-1</sup> (E<sub>2g</sub><sup>1</sup> mode), and ~261 cm<sup>-1</sup> (A<sub>1g</sub> mode). b) Photoluminescence spectra, a strong emission at ~755 nm corresponding to the A excitonic absorption for monolayer-WSe<sub>2</sub>.

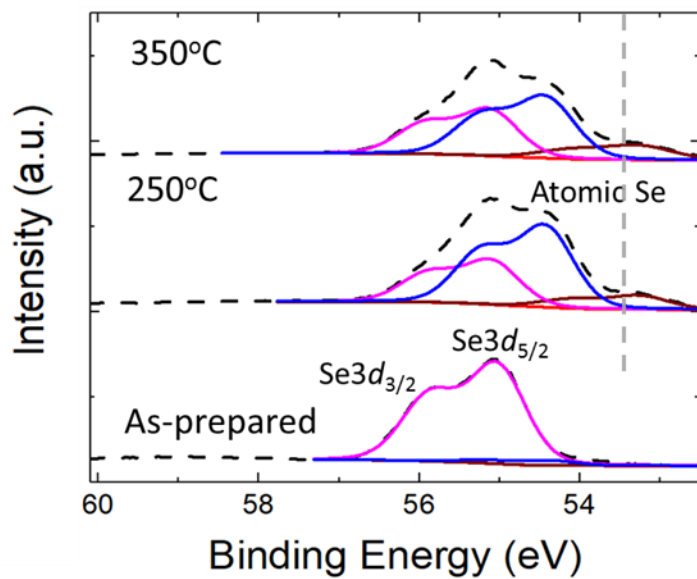

**Figure S8.** Synchrotron based X-ray photoemission spectra of Se 3d core level peak regions of WSe<sub>2</sub> on Au film annealed at various temperatures.

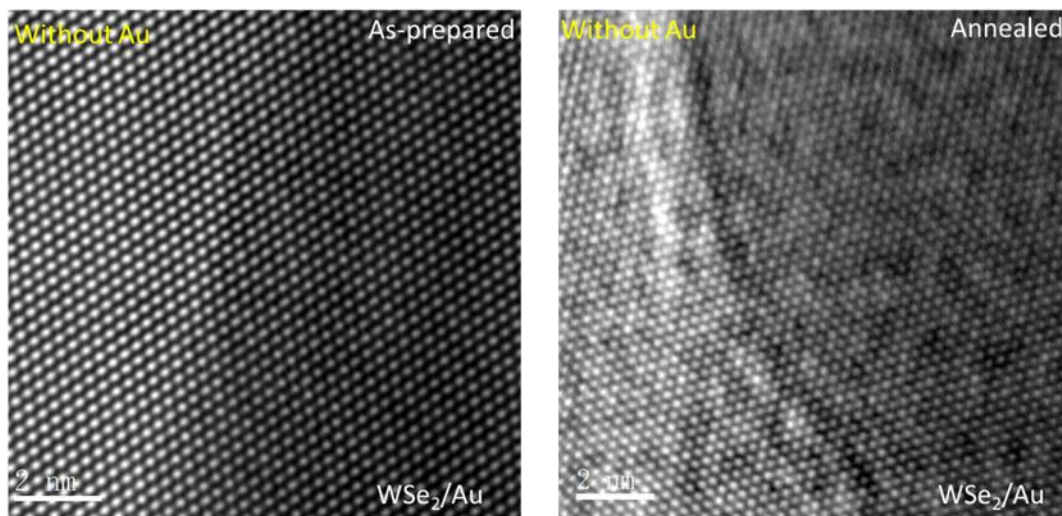

**Figure S9.** HRTEM images of WSe<sub>2</sub>/Au before (left) and after (right) annealing at 250 °C.

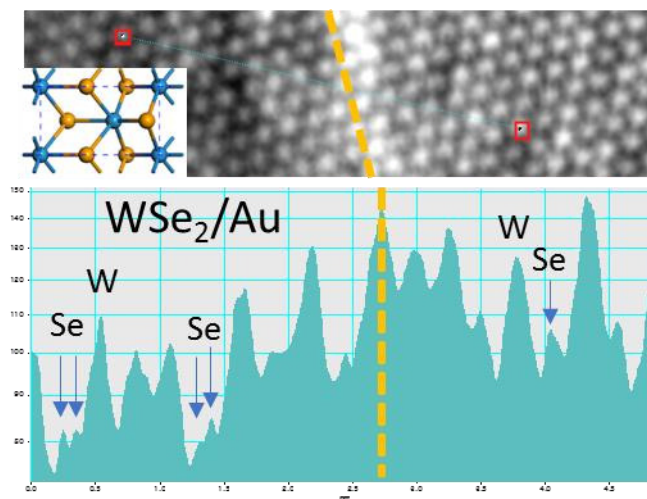

**Figure S10.** Intensity profiles along the blue lines indicated in above HRTEM images of annealed (at 250 °C) samples. The dark region shows the region where monolayer-WSe<sub>2</sub> lies above the Au substrate (WSe<sub>2</sub>/Au), while the other is the region where monolayer-

WSe<sub>2</sub> is suspended in vacuum. The yellow lines show the boundary between these two regions.

### Supporting Tables

| Annealing Temperature (°C) | Mo3d <sub>5/2</sub> in 1T'-phase (%) |
|----------------------------|--------------------------------------|
| As-prepared                | 7.0                                  |
| 250                        | 54.0                                 |
| 300                        | 85.7                                 |
| 350                        | 81.9                                 |

**Table S1.** Yield in 1T'-phase MoS<sub>2</sub>/Cu after annealing. Percentage yield in 1T'-phase MoS<sub>2</sub>/Cu as represented by the Mo3d<sub>5/2</sub> proportion upon annealing at the respective temperatures.

| Annealing Temperature (°C) | W4f <sub>7/2</sub> in 1T'-phase (%) |
|----------------------------|-------------------------------------|
| As-prepared                | 10.0                                |
| 250                        | 58.8                                |

**Table S2.** Yield in 1T'-phase WSe<sub>2</sub>/Au after annealing. Percentage yield in 1T'-phase WSe<sub>2</sub>/Au as represented by the W4f<sub>7/2</sub> proportion upon annealing at the respective temperatures.
